1

2

3 **Ingestion of poisonous eggs from the invasive apple snail *Pomacea canaliculata* adversely**

4 **affects bullfrog *Lithobates catesbeianus* intestine morphophysiology**

5

6

7 Tabata R. Brola<sup>1</sup>, Marcos S. Dreon<sup>1,2</sup>, Patricia E. Fernández<sup>3</sup>, Enrique L. Portiansky<sup>4</sup> and Horacio  
8 Heras<sup>1,5\*</sup>.

9

10 <sup>1</sup>Instituto de Investigaciones Bioquímicas de La Plata “Profesor Doctor Rodolfo R. Brenner”  
11 (INIBIOLP), CONICET - UNLP, La Plata, Argentina.

12 <sup>2</sup>Cátedra de Bioquímica y Biología Molecular, Facultad de Cs. Médicas, Universidad Nacional de  
13 La Plata (UNLP), Argentina.

14 <sup>3</sup>Instituto de Patología B. Epstein. Cátedra de Patología General, Facultad de Cs. Veterinarias,  
15 UNLP, Argentina.

16 <sup>4</sup>Laboratorio de Análisis de Imágenes (LAI), Cátedra de Patología General, Facultad de Cs.  
17 Veterinarias, Universidad Nacional de La Plata (UNLP), Argentina.

18 <sup>5</sup>Cátedra de Química Biológica, Facultad de Cs. Naturales y Museo, Universidad Nacional de La  
19 Plata (UNLP), La Plata, Argentina.

20 \*Corresponding Author

21 Prof. Horacio Heras.

22 Instituto de Investigaciones Bioquímicas de La Plata (INIBIOLP), Consejo Nacional de  
23 Investigaciones Científicas y Técnicas (CONICET) - Universidad Nacional de La Plata,  
24 calle 60 y 120, (1900) La Plata, Argentina.

25 Fax: 54 (221) 425-8988; Tel: 54 (221) 482-4894

26 Email: [h-heras@med.unlp.edu.ar](mailto:h-heras@med.unlp.edu.ar)

27 **ORCID** HH 0000-0003-3379-0216

28

29 **Key words:** *Pomacea*, egg defense, bullfrog, frog small intestine, lectin, toxicity

30

## 31 **DECLARATIONS**

### 32 **Funding**

33 This study was funded by Consejo Nacional de Investigaciones Científicas y Técnicas  
34 (CONICET; PIP 112-200901-0051), Agencia Nacional de Promoción Científica y Tecnológica  
35 (ANPCyT, PICT 2014-0850 and PICT 2015-0661). HH and EP are researchers in CONICET,  
36 MSD is researchers in CIC, TRB is a PhD fellow at CONICET, PEF is Professor at UNLP.

### 38 **Conflicts of interest/Competing interests**

39 We have no competing interests. We have no conflicts of interest.

### 41 **Ethics Statement**

42 Animal studies were performed in accordance with the Guide for the Care and Use of Laboratory  
43 Animals (2010) and Frogs and toads as experimental animals (Tyler 2009).

### 45 **Consent for publication**

46 All authors have given their consent for publication.

### 48 **Availability of data and material**

49 Data generated or analysed during this study are included in this published article and its  
50 supplementary information files.

### 52 **Authors' contributions**

53 TRB MSD HH conceived and designed the experiments. TBR PEF ELP MSD performed the  
54 experiments. TBR PEF ELP MSD HH analysed the data. HH contributed  
55 reagents/materials/analysis tools. TBR PEF ELP MSD HH wrote the paper.

### 57 **Acknowledgments**

58 We are grateful to Natalia Scelcio and Guadalupe Guidi for their help with the histological work.  
59 This study was supported by a Grant from Agencia Nacional de Promoción Científica y Técnica,  
60 ANPCyT (PICT No. 2014 0850) to HH. TRB, ELP and HH are researchers of Carrera del  
61 Investigador, CONICET, Argentina.

62

# 63 ABSTRACT

64 The poisonous eggs of *Pomacea canaliculata* (Caenogastropoda, Ampullariidae) hardly have any  
65 predator. This invasive snail, listed among the 100 worst invasive species, is a serious crop pest  
66 and a vector of a human parasitosis. Females lay eggs in pink-reddish masses, presumably as a  
67 warning coloration of their chemical defenses. Egg ingestion alters rodents' gastrointestinal tract  
68 and is lethal if injected, but its effect on other taxa is unknown. Here we explored the toxic effects  
69 of *Pomacea canaliculata* eggs on bullfrog *Lithobates catesbeianus* (Anura, Ranidae).

70 Juvenile bullfrogs were gavaged with egg extracts and their digestive tract analyzed after 24 h  
71 and 48 h using histological, immunohistochemical and lectin-histochemical techniques. Toxicity  
72 was also evaluated by intraperitoneal injection of eggs extracts.

73 Egg extract ingestion adversely affected small intestine of bullfrogs. Short term (24 h) effects  
74 included large, reversible changes of the intestinal wall, villi morphology, and changes in the  
75 glycosylation patterns of enterocytes. The mucosal area increased and infiltration of inflammatory  
76 cells, mainly eosinophils and macrophages, were observed together with a weak hemorrhage.  
77 Most of these changes reversed after 48 h. Besides, intraperitoneal injection of egg extract was  
78 nontoxic to bullfrog juveniles and no lethality or behavioral changes were observed, a remarkable  
79 difference with egg' effect on mammals.

80 As a whole, these results indicate that toxins of apple snail eggs reversibly modify gut  
81 morphology, which may alter bullfrog physiology limiting their ability to absorb egg nutrients.  
82 This study extends the known targets of the apple snail egg defenses against predation to  
83 amphibians.

84

# INTRODUCTION

Eggs of most animals are subject to strong predation (Ricklefs 1969, Kamler 2005). One of the exemptions are the eggs of the freshwater apple snail *Pomacea canaliculata* (Lamarck, 1822) (Caenogastropoda, Ampullariidae). Native from South America, this snail has been introduced worldwide becoming an invasive species and a vector of a human parasitosis (Hayes et al. 2008; Lv et al. 2011). Their invasiveness is partly related to their reproductive strategy (Lowe et al. 2000; Martin and Estebenet 2002, Hayes et al. 2012), especially to their egg defenses (Heras et al. 2008, Dreon et al. 2010, 2013, 2014). Females deposit pink-reddish egg masses outside the water on a weekly basis, each containing 30–300 eggs (Albrecht et al. 1996; Cadierno et al. 2018) filled with a perivitelline fluid (PVF) that surrounds the developing embryo. PVF is known to serve the critical functions of embryonic nutrition, protection and defense in *P. canaliculata* (Heras et al. 1998; Heras et al. 2007). Thus, the PVF enable eggs to develop under harsh aerial conditions including desiccation high temperatures, and help coping with terrestrial predators (Dreon et al. 2004; Heras et al. 2007; Dreon et al. 2007). Even more, predators that feed on adults, like the snail kite *Rostrhamus sociabilis* (Vieillot, 1817) or the Norway rat *Rattus norvegicus* (Berkenhout, 1769), systematically discard the albumen gland where most egg PVF is synthesized (Przeslawski 2004, Cadierno et al. 2017b,a, Hayes et al. 2015).

The PVF of *P. canaliculata* contains more than 30 proteins (perivitellins) (Sun et al. 2012; Sun et al. 2019) including a hyperstable non-digestible carotenoprotein (PcOvo), massively accumulated in the egg. PcOvo has a dual function, on the one hand it can resist proteolysis and withstands passage through the digestive tract of rodents almost unaffected, lowering the nutritional value of the eggs (Pasquevich et al. 2017; Dreon et al. 2010; Dreon et al. 2014). On the other hand, it provides clutches with a vivid coloration (aposematic), probably a warning to visual hunting predators of their toxic defenses. The PVF defensive cocktail also includes a neuro- and enterotoxic lectin (PcPV2), lethal to mice when intraperitoneally injected, that adversely affects their gastrointestinal tract if ingested (Heras et al. 2008, Giglio et al. 2020). Furthermore, oral administration of *P. canaliculata* PVF to rodents alters their gut morphophysiology and

decreases rat growth rate (Dreon et al. 2014; Giglio et al. 2018). These unusually efficient biochemical defenses may explain the lack of reported predators for the eggs (Cadierno et al. 2017a). However, most of the studies on the defensive system of *P. canaliculata* eggs have been conducted using only mammals as models, and whether the ingestion of these perivitellins affect other taxa is unknown. Amphibians are a likely target of these defenses and their digestive physiology may differ considerably from that of mammals (Sabat and Bozinovic 2000). Besides, many anurans and urodeles overlap in their geographical distribution with those of the apple snail. In particular, the invasive bullfrog *Lithobates catesbeianus* (Shaw, 1802) (Anura, Ranidae) partially overlaps with *P. canaliculata* geographical distribution in both their native and introduced regions (Akmentins and Cardozo 2010).

To explore possible targets of *P. canaliculata* egg defense system beyond mammals, and to further understand the biological-ecological meaning of the digestive plasticity in amphibians, we selected *L. catesbeianus* as a model of potential predator of the eggs. This North American frog, introduced to several parts of the world including South America, has voracious habits and a varied diet including eggs of both vertebrates and invertebrates species (Hirai 2004; Snow and Witmer 2010).

We report here that oral administration of *P. canaliculata* PVF to juvenile bullfrogs has a strong adverse effect on gut at tissue and organ levels, temporarily affecting their small intestine morphology and inducing an extended cellular reactive reaction. Most of these changes were reversed after 48 h. However, unlike mammals, no lethal or neurotoxic effects were observed when injected with snail egg extracts. As far as we know, the occurrence of toxins that affect intestinal morphology probably affecting absorption, has not been recognized among amphibians before. This is the first report of a poisonous effect by the ingestion of *P. canaliculata* egg extracts on a vertebrate other than mammals.

## **METHODS**

### **Egg masses and PVF preparation**

139 *P. canaliculata* egg clutches were collected from the field in La Plata city, Buenos Aires,  
140 Argentina, between November and March during the reproductive season. Only eggs not beyond  
141 morula stage were used. PVF was prepared following Dreon et al. (2014). Briefly, eggs were  
142 homogenized in ice cold 20 mM Tris-HCl, pH 7.5 in a buffer: sample ratio of 3:1 v/w. The  
143 homogenate was sequentially centrifuged at 10,000 g for 30 min and at 100,000 g for 60 min, and  
144 the pellet discarded. The supernatant (egg PVF) was equilibrated in 50 mM phosphate buffer  
145 saline (PBS), pH 7.4 using a centrifugal filter device of 50 kDa molecular weight cut off  
146 (Millipore Corporation, MA). Total protein concentration was measured by the method of Lowry  
147 et al. 1951.

148

# 149 **Experimental animals**

150 Sexually immature juvenile bullfrogs *Lithobates catesbeianus* were purchased from an aquarium  
151 in Buenos Aires, Argentina, and bred in a specially conditioned room at the facilities of the School  
152 of Medicine, National University of La Plata. They were housed in plastic 60x40x50 cm  
153 containers with natural vegetation and soil. Water provided in plastic containers was changed  
154 daily. Frogs were maintained with a 12-h dark/light cycle at  $22 \pm 3$  °C and fed once a day either  
155 with *Tenebrio* larvae or adult *Blattella dubia*.

156

# 157 **Lethality test**

158 To assess the PVF lethality on frogs, a preliminary screening test was performed. Groups of five  
159 bullfrog ( $4.0 \pm 1.1$  g) were intraperitoneally (i.p.) injected with a single dose of 200 µl of either  
160 PBS (control) or the same volume of a serial dilution of five concentrations of PVF in the range  
161 1.5 – 12.0 mg/Kg using a 30G x 13 mm needle. As lethality was not observed, a second test was  
162 performed injecting three bullfrogs with 200 µl of 170 mg/Kg PVF, the highest possible  
163 concentration, which was 50 times higher than the LD<sub>50</sub> established for mice (Heras et al. 2008).  
164 Animals were observed during 96 h after administration for lethality and behavioral changes.

165

## 166 **Histology analysis**

167 Bullfrogs (n=6) were gavaged with a single dose of 200 µl of PVF (9 mg/ml) using a flexible  
168 plastic cannula. Control animals (n=3) were administrated with the same volume of PBS. Groups  
169 of three animals were euthanized either after 24 h or 48 h post-administration by immersion in a  
170 water bath containing Tricaine methane-sulfonate (MS-222) 0.2 mg/ml, following the procedure  
171 described by Tyler (2009). Intestines were removed and samples of the first part of the small  
172 intestine were cut, rinsed several times with PBS and then fixed in 10% neutral buffered formalin  
173 for 48 h for histological examination. After 48 h fixation, samples were transferred into 70°  
174 ethanol and dehydrated before being embedded in paraffin wax at 60°C for 1 h. Five to seven µm  
175 thick sections were obtained from the paraffin blocks using a manual microtome and routinely  
176 stained with haematoxylin and eosin (HE) according to Bancroft and Gamble (2008). Analysis  
177 was performed using an Olympus BX51 microscope. Digital images were obtained using an  
178 Olympus DP-70 video camera and then captured with an image analyzer (ImagePro Plus v.6.3,  
179 Media Cybernetics, USA).

180

## 181 **Morphometric analysis**

182 Changes in small intestine morphometry caused by PVF administration were measured from  
183 images (4x magnification) obtained using the image analyzer (ImagePro Plus) from 9 properly  
184 oriented HE stained sections per animal, a total of 27 images for each experimental group.  
185 “Section area” (SA) was measured considering both mucosa (epithelium, and lamina propria) and  
186 the lumen area, but excluding muscular layer. “Tissue area” (TA) was measured considering the  
187 relative area of the mucosa to SA and excluding lumen area. The relation between lumen area and  
188 SA was also measured. To estimate the absorptive surface, perimeter of the epithelium facing  
189 lumen was measured in relation to SA.

190

## 191 **Presence of eosinophils and macrophages cells**

192 A total of 27 small intestine sections for each group were analyzed to determine the presence of  
193 eosinophils and macrophages, which were counted in 5 randomly chosen fields of 0.05 mm<sup>2</sup> from  
194 each section (60x magnification, 135 fields per experimental group). The presence of eosinophils  
195 was determined in HE stained sections. Macrophages were determined by immunohistochemistry  
196 (IHC). Briefly, sections were deparaffinized, hydrated through graded ethanol and incubated  
197 overnight at 4°C with a mouse anti-human CD68 clone KP1 monoclonal antibody (1:100, Dako,  
198 Denmark). Then, sections were revealed with a commercial kit (LSAB System-HRP, Dako,  
199 Denmark) that includes a streptavidin-biotin labeled secondary antibody. The colored reaction  
200 was developed using 3,3'-diaminobenzidine tetrahydrochloride (DAB, Dako, Denmark)  
201 (chromogen) and H<sub>2</sub>O<sub>2</sub> as reaction substrates. All sections were then counterstained with Mayer's  
202 hematoxylin before analysis. Dark brown stained cells were considered positive.

203

#### 204 **Binding assay of PcPV2 toxic lectin to gut**

205 The binding and location of PcPV2 to epithelial cells of the small intestine was performed on  
206 control, 24 h and 48 h post-gavage with PVF as described in Histology analysis section. Nine  
207 sections for each treatment were mounted on positively charged slides, deparaffinized,  
208 dehydrated, and incubated in 3% H<sub>2</sub>O<sub>2</sub> in methanol for 30 min at room temperature. Slides were  
209 rinsed with PBS (pH = 7.4) and then subjected to antigen retrieval procedure using proteinase K  
210 1:30 (Dako, Denmark). Nonspecific binding sites were blocked with 2% BSA for 30 min in a  
211 humid chamber at 4°C, followed by overnight primary anti-PcPV2 polyclonal antibody (1:200)  
212 incubation. Slides were then revealed using the Envision plus kit (Dako, Carpinteria, CA,  
213 USA). Polyclonal antibodies against PcPV2 were prepared in rabbits as previously described  
214 (Dreon et al. 2002). Positively immunostained regions showed a golden dark brown color using  
215 3,3'-diaminobenzidine tetrahydrochloride (DAB) as chromogen and H<sub>2</sub>O<sub>2</sub> reaction substrates  
216 (DakoCytomation, Glostrup, Denmark). All sections were counterstained with Maeyer's  
217 hematoxylin.

218



## 219 **Collagen determination**

220 Five 5  $\mu$ m thick sections of the intestine of bullfrogs were stained using the Picrosirius red  
221 technique (Direct Red 80, Aldrich, Milwaukee, WI 53233, USA) for collagen evaluation, as  
222 described elsewhere (Portiansky et al. 2002). Briefly, sections were deparaffinized, hydrated  
223 through graded ethanol and stained for 1 h in a 0.1% solution of Sirius Red dissolved in aqueous  
224 saturated picric acid. Sections were then rapidly washed in running tap water and counterstained  
225 with Harris hematoxylin.

226 Samples observed under polarized light, using an analyzer (U-ANT, Olympus) and a polarizer  
227 (UPOT, Olympus) were used to study the birefringence of the stained collagen. Type I collagen  
228 reflected red to yellow light, while type III collagen reflected green light. Histological (20 $\times$   
229 magnification) images were digitized using a digital video camera (Olympus DP73, Japan)  
230 mounted on a widefield microscope (Olympus BX53, Japan). Captured images were saved in TIF  
231 format using an image analysis software (Olympus cellSens Dimension V1.7, Japan)  
232 automatically coordinated with the camera for later analysis. Total collagen was calculated as the  
233 sum of all connective tissue areas of the coronal sections (type I and type III collagen), divided  
234 by the total surface of the section.

235

## 236 **Lectin histochemistry**

237 To analyze possible changes in the glycosylation pattern of the enterocytes, tissues were evaluated  
238 with seven lectins (Lectin Biotinylated BK 1000 Kit, Vector Laboratories Inc., Carpinteria, CA,  
239 USA) namely: Con A (*Concanavalia ensiformis*), DBA (*Dolichos biflorus*), SBA (*Glycine max*),  
240 PNA (*Arachis hypogaea*), RCA-I (*Ricinus communis-I*), UEA-I (*Ulex europaeus-I*), and WGA  
241 (*Triticum vulgaris*). Briefly, 9 small intestine sections were deparaffinized with xylene  
242 dehydrated with 100% alcohol twice, 10 min each, and then endogenous peroxidase activity was  
243 quenched by incubating 5 min with 0.3-3.0% hydrogen peroxide in methanol. They were then  
244 hydrated, washed with PBS, and incubated with biotinylated lectins overnight. Sections were then  
245 washed with PBS, followed by 10-min incubation with streptavidin-HRP (streptavidin conjugated

246 to horseradish peroxidase in PBS containing stabilizing protein and anti-microbial agents, Vector  
247 Laboratories Inc., USA). Finally, the bounded lectins were visualized incubating for 4-10 min  
248 with a buffered Tris-HCl solution (0.05 M, pH =6.0) containing 0.02% 3,3'-diaminobenzidine  
249 tetrahydrochloride (DAB) and 0.05% H<sub>2</sub>O<sub>2</sub> (DAB; Dako, Carpinteria, USA). Sections were  
250 counterstain with Mayer's haematoxylin. Enterocytes were divided into three zones for analysis:  
251 apical zone, stroma and supranuclear zone. Goblet cells were also analyzed. Tissues showing  
252 golden brown coloration were considered positive and given a qualitative value according to the  
253 intensity of color.

254

## 255 **Statistical analysis**

256 A Kruskal-Wallis test was used to test morphometric differences. Differences between control,  
257 24 h and 48 h post-gavage groups were determined by Dunn's multiple comparison test. For  
258 absorptive surface analysis and collagen, one-way ANOVA was performed among control, 24 h  
259 and 48 h post-gavage groups. For post hoc comparison, the Tukey's multiple comparison test was  
260 used. Statistical analysis was performed using Prism 5.03 (Graphpad Software Inc.). Results were  
261 considered significant at the 5% level.

262

## 263 RESULTS

### 264 Ingestion of egg PVF affects small intestine morphology of bullfrog

265 To evaluate the effect of gavage administration of PVF, the morphometry of bullfrog small  
 266 intestine was analysed (Fig.1A). We found that after 24 h the small intestine mucosa area  
 267 increased its area fraction with a mean of  $0.80 \pm 0.05$  as compared with the control group ( $0.62$   
 268  $\pm 0.08$ ), while at 48h post-gavage the area fraction was reduced to  $0.69 \pm 0.12$  (Fig.1B).  
 269 Simultaneously, lumen area fraction was significantly reduced after 24 h ( $0.20 \pm 0.08$ ) as  
 270 compared to controls ( $0.36 \pm 0.08$ ), while at 48 h after gavage values were similar to those of  
 271 controls ( $0.31 \pm 0.09$ ) (Fig.1C). No changes in the absorptive surface were observed (Fig.1D). The  
 272 villi of control animals were long with a continuous epithelium containing some goblet cells and  
 273 well-defined central lymphatic capillaries (lacteal vessel) (Fig. 1E). After 24 h of PVF gavage,  
 274 villi became wider almost obstructing lumen space, with the tip of the villi showing epithelial  
 275 disorganization. Besides, the lamina propria was remarkably thickened (Fig.1F). The whole  
 276 epithelium became discontinuous, with fewer goblet cells and a weak haemorrhage was observed  
 277 (Fig.2). Forty-eight hours after gavage, the mucosa began to return to its normal morphology,  
 278 showing narrower villi and wider lumen space than 24 h before. Nevertheless, the lamina propria  
 279 was thicker than in controls (Fig.1G).

280

### 281 Gavage of egg PVF induces inflammatory response in small intestine of bullfrogs

282 Small intestine showed an increased number of reactive cells 24h and 48h-post-gavage as  
 283 compared to control group. Eosinophils were found both in the lamina propria and between  
 284 enterocytes. In control frogs 0 to 2 eosinophils were counted per field (Fig. 3A) while 24h post-  
 285 gavage an increase in the number of eosinophils (7-14 eosinophils per field) was observed (Fig.  
 286 3B) decreasing to 1-6 eosinophils per field at 48 h post-gavage (Fig.3C).

287 The number of macrophages in the small intestine was also affected 24h post-gavage, where  
 288 many immunolabelled macrophages were scattered in the lamina propria or between enterocytes  
 289 (Fig. 3E). The observed number was much higher than the basal level of macrophages which were

290 barely seen in control sections (Fig. 3D). Again, at 48 h post-gavage less labelled cells were  
291 observed than 24 h before, with a counting similar to that of the control group (Fig. 3F).

292 Analysis of the amount of collagen in the lamina propria showed no differences in the amount  
293 of total collagen among the three experimental groups (Fig. 3 G). However, changes in the type  
294 of collagen were observed 24 h after gavage where there was an increase in collagen I and a  
295 reduction in collagen III as compared with the other experimental groups. This resulted in an  
296 increase of collagen I: III ratio as compared with the other two groups (Fig 3 H).

297

# 298 **Ingestion of egg PVF induces changes in carbohydrate glycosylation pattern of enterocytes**

299 Lectin histochemical analysis showed differential reactivity to seven commercial lectins,  
300 particularly towards DBA, PNA and SBA (Table 1). Control sections assayed with DBA showed  
301 intense staining at the supranuclear and apical regions. Enterocytes and goblet cells were also  
302 labelled although less intensely (Fig. 4A). Twenty-four hour after gavage, enterocyte supranuclear  
303 zone was clearly negative for DBA as well as goblet cells while the apical region showed no  
304 changes as compared to controls (Fig. 4B). In animals euthanized 48 h post-gavage, staining with  
305 DBA was strong both at the supranuclear and apical regions while goblet cells display light  
306 staining (Fig. 4C). A similar weak reactivity was observed with PNA in supranuclear zone 24 h  
307 post-gavage (Fig. 4E) as compared to control group (Fig. 4D), but unlike DBA this zone stayed  
308 unstained 48 h after gavage (Fig. 4F). Goblet cells were not stained by PNA neither in control nor  
309 in treated intestines. SBA binding showed changes 24 h post-treatment where enterocytes showed  
310 stronger reactivity at the supranuclear zone (Fig. 4H) than those of control animals (Fig. 4G).  
311 After 48 h of gavage supranuclear and apical regions of enterocytes were strongly stained (Fig  
312 4I).

313 Interestingly, PcPV2, the enterotoxic lectin of the PVF, also binds to the intestinal epithelium,  
314 as revealed by anti-PcPV2 antibodies. The apical zone of the enterocytes facing the lumen showed  
315 clear signs of toxin immunolabelling 24 h and 48 h after gavage especially at the tip of the villi  
316 (Fig.5).

317

# 318 **Intraperitoneal injection of *P. canaliculata* egg PVF is nontoxic to bullfrog**

319 After 96 h of the i.p. injection of *P. canaliculata* PVF no mortality nor behavioural changes among  
320 juvenile bullfrogs were observed even though PVF concentration was 50 times higher than LD50  
321 reported for mice. Animals were observed for any neurological associated signs, including  
322 weakness, lethargy or paralysis of rear limbs. None of these signs or any other behavioural  
323 changes were observed.

324

## 325 **DISCUSSION**

326 It is expected that strong predation would select for characteristics rendering eggs inedible or  
327 more difficult to obtain. In this regard, *P. canaliculata* eggs have evolved a suite of unique  
328 biochemical defenses to avoid predation well documented in rodents. Here we extend to other  
329 taxa the knowledge of potential predators observing that ingestion of the poisonous eggs of *P.*  
330 *canaliculata* also adversely affect the digestive system of an amphibian.

331 A work performed on mammals showed that PVF have a lethal neurotoxic effect on mice  
332 within hours after i.p. injection (Heras et al. 2008). By contrast, i.p injection of PVF to bullfrogs  
333 has no lethal effect, even at a concentration 25 times higher than the concentration that would kill  
334 100% of mice. Moreover, while sublethal doses produce rear limbs paralysis, lethargy and pain  
335 in mice none of these neurological signs were observed in bullfrogs after injection. These  
336 contrasting results between taxa suggest that the target cell or molecule for PcPV2 -the toxic lectin  
337 causing these effects on mice (Dreon et al. 2013) might be missing in anurans or, alternatively,  
338 that anurans inactivate PcPV2 in their digestive system. This last hypothesis is not supported by  
339 the fact that PcPV2 strongly binds to enterocytes *in vivo*.

340 Although apple snail PVF was not lethal to frogs, it severely affects their gastrointestinal tract.  
341 After 24 h of PVF gavage, intestinal morphology undergoes a dramatic change such as the  
342 increased amount of connective tissue causing an obstruction of the lymphatic vessels, and a  
343 marked epithelia disorganization at the tip of the villi. As far as we know, there is no report of

344 similar effects induced by other potential prey on anurans upon ingestion, which limits  
345 comparisons. However, some of these morphological changes resemble those exerted by toxic  
346 anthropogenic compounds on herpetofauna (Ozelmas and Akay 1995, Çakici 2014; 2016, Çakici  
347 and Akat 2012). All changes were temporary and 48 h after gavage treated intestines resembled  
348 those of control frogs with thinner villi and the connective tissue almost reduced to the values of  
349 the non-exposed group. Moreover, some villi showed normal lymphatic vessels and nearly normal  
350 lumen space. Histopathologic effects on anuran small intestine, also observed on rats receiving  
351 these egg extracts (Dreon et al. 2014), resemble those exerted by toxic plant lectins (Vasconcelos  
352 and Oliveira 2004) that affect gut morphophysiology, at least in mammals and insects (Oliveira et  
353 al. 2004; Bardocz et al. 1995). Plant lectins, combined with digestive proteases inhibitors and  
354 kinetically stable proteins, provide an effective biochemical defense against predators (Duffey  
355 and Stout 1996; Xia et al. 2007, Van Damme 2008). Such mechanism has only been described in  
356 animals in *Pomacea* snails (Dreon et al. 2014; Pasquevich et al. 2017, Ituarte et al. 2018). *P.*  
357 *canaliculata* PVF protease inhibitors (Ituarte et al. 2019), lectins (Dreon et al. 2014) and  
358 enterotoxins (Giglio et al. 2020) are responsible for the changes in the gut of rodents and this may  
359 possibly be the case for anurans as well. Indeed, PcPV2 binds to the enterocyte membrane of both  
360 frogs (this study) and rats *in vivo* and to Caco-2 cells in culture (Dreon et al. 2013). The fact that  
361 the ortholog PmPV2 has enterotoxic properties on mammalian models (Giglio et al. 2020), further  
362 support that PV2 lectins from eggs would induce the histopathologic effects on frogs gut.

363 Enterocytes exposed to PVF also showed altered glycosylation patterns, mostly revealed by  
364 DBA, SBA and PNA. This study provides one of the few descriptions of the glycan pattern in  
365 amphibian intestine. Studies on the lectin histochemistry of the gastrointestinal tract of anurans  
366 are scarce and on other developing stages (Kaptan et al. 2013), which limits further comparisons.  
367 Considering that glycan pattern can be affected by dietary habits, results suggest that PVF is  
368 inducing reversible changes in the surface glycosylation of the enterocytes. Altered reactivity with  
369 SBA and PNA were also observed in gut of rats fed with a diet supplemented with *P. canaliculata*  
370 PVF (Dreon et al. 2014). Taking into account that dietary lectins can induce changes in

glycosylation patterns of gut epithelium (Pusztai et al. 1995) it is tempting to speculate that PVF lectins would be responsible for the observed glycosylation changes in the frog intestine.

Inflammation in frogs may be induced by a variety of physiological stressors including habitat perturbation, resource competition, parasites and pollution (Robert et al. 2014). The PVF also induced an inflammatory response 24 h after gavage with eosinophils and macrophages markedly increasing their number. Allergies may induce this cellular response though current results preclude further speculation (McGavin and Zachary 2017). Nonetheless, the response tends to revert to normal by 48 h post-gavage. This cellular reaction and the associated sudden increase of connective tissue may also be related to the enlargement of the villi and lymphatic vessel compression. Inflammatory process was not observed in rats fed with PVF under similar experimental conditions (Dreon et al. 2014; Dreon et al. 2013). Remarkably a few studies on the effect of pesticides on the digestive tract of frogs also report infiltration of eosinophils and other reactive cells (Cengiz and Unlu 2006; Velmurugan et al. 2007, Çakici 2014).

As a whole, our results indicate that 48 h after the ingestion of the PVF bullfrogs adapt to the exposure to poisonous apple snail eggs extracts. Similar temporary effects were observed in rats ingesting the same *Pomacea* egg extracts, and in rats and pigs ingesting plant lectins. It is known that the anatomy and function of the digestive tract of many vertebrate species are flexible, and can change in response to variations in environmental conditions (Karasov and Douglas 2013). Considering digestive flexibility (or plasticity) as the ability to adaptively modulate the physiology of the gut to digest different food types (Brzęk et al. 2011) we can suggest that bullfrogs have a fast-adaptive response. This is possible because the small intestine has the shortest turnover rate of all tissues in the body and, at least in mammals, it takes only 3 days to cover the entire surface with new cells. Likewise, studies on gut plasticity in amphibian, mostly performed in tadpoles (Naya et al. 2005; Ruthsatz et al. 2019), show that anurans have adaptive mechanisms that modify the activity of gastrointestinal tract (Cramp and Franklin 2005; Seliverstova and Prutskova 2012). Changes in the relative amount of collagen fibers may be related to gut reaction after ingestion of snail PVF and associated with a remodeling process although more work is needed to fully understand this issue. Our findings are consistent with the

399 notion that bullfrogs have an adaptive response towards toxic eggs ingestion that includes a fast  
400 remodeling of the gut. To the best of our knowledge, there is no report for such response  
401 mechanism towards a potential prey in amphibians. The recently sequenced genomes of both  
402 species, the American bullfrog (Hammond et al. 2017) and *P. canaliculata* (Sun et al. 2019)  
403 provide an unprecedented model to study predator-prey interactions of two invasive aquatic  
404 organisms at a molecular level, and may suggest interesting directions for future research.

405

# 406 REFERENCES

407 Akmentins MS & Cardozo DE. (2010) American bullfrog *Lithobates catesbeianus* (Shaw, 1802)  
408 invasion in Argentina. Biol Invasions 12:735–737. doi:10.1007/s10530-009-9515-3.

409 Albrecht EA, Carreño NB & Castro-Vazquez A. (1996) A quantitative study of copulation and  
410 spawning in the South American apple-snail, *Pomacea canaliculata* (Prosobranchia:  
411 Ampullariidae). Veliger 39:142–147.

412 Bancroft JD, Gamble M (2008) Theory and practice of histological techniques, 6th ed. Churchill  
413 Livingstone, Edinburgh.

414 Bardocz S, Grant G, Ewen SW et al. (1995) Reversible effect of phytohaemagglutinin on the  
415 growth and metabolism of rat gastrointestinal tract. Gut 37:353–360. doi:10.1136/gut.37.3.353.

416 Brzęk P, Kohl KD, Caviedes-Vidal E et al. (2011) Fully reversible phenotypic plasticity of  
417 digestive physiology in young house sparrows: Lack of long-term effect of early diet composition.  
418 J Exp Biol 214:2755–2760. doi:10.1242/jeb.058727.

419 Cadierno M. Pilar, Burela S, Dreon MS et al. (2017a) The influence of energy, nutritional value  
420 and noxiousness of prey in sex- and size-biased predation by Snail Kites in southern South  
421 America. Emu 117:382–387. doi:10.1080/01584197.2017.1338113.

422 Cadierno María Pilar, Dreon MS & Heras H. (2017b) Apple Snail Perivitellin Precursor  
423 Properties Help Explain Predators' Feeding Behavior. Physiol Biochem Zool 90:461–470.  
424 doi:10.1086/691526.



- 425 Cadierno MP, Saveanu L, Dreon MS et al. (2018) Biosynthesis in the albumen gland-capsule
- 426 gland complex limits reproductive effort in the invasive apple snail *Pomacea canaliculata*. Biol
- 427 Bull 235:1–11. doi:10.1086/699200.
- 428 Çakici Ö. (2014) Carbaryl-induced Histopathologic Alterations in the Digestive Tract of the
- 429 Levantine Frog, *Pelophylax bedriagae* (Anura: Ranidae). Toxicol Pathol 42:1032–1040.
- 430 doi:10.1177/0192623313503517.
- 431 Cakici O & Akat E. (2012) Histopathological effects of carbaryl on digestive system of snake-
- 432 eyed lizard, *ophisops elegans*. Bull Environ Contam Toxicol 88:685–690. doi:10.1007/s00128-
- 433 012-0571-5.
- 434 Çakıcı Ö. (2016) Histopathological study of toxic effects of carbaryl on digestive tract of
- 435 *Bufo variabilis* (Anura: Bufonidae). Environ Sci Pollut Res 23:13432–13437.
- 436 doi:10.1007/s11356-016-6529-0.
- 437 Cengiz EI & Unlu E. (2006) Sublethal effects of commercial deltamethrin on the structure of the
- 438 gill, liver and gut tissues of mosquitofish, *Gambusia affinis*: A microscopic study. Environ
- 439 Toxicol Pharmacol 21:246–253. doi:10.1016/j.etap.2005.08.005.
- 440 Cramp RL & Franklin CE. (2005) Arousal and re-feeding rapidly restores digestive tract
- 441 morphology following aestivation in green-striped burrowing frogs. Comp Biochem Physiol - A
- 442 Mol Integr Physiol 142:451–460. doi:10.1016/j.cbpa.2005.09.013.
- 443 Dreon M, Lavarias S, Garin CF et al. (2002) Synthesis, distribution, and levels of an egg
- 444 lipoprotein from the apple snail *Pomacea canaliculata* (mollusca: Gastropoda). J Exp Zool
- 445 292:323-30. doi:10.1002/jez.10043.
- 446 Dreon MS, Ceolín M & Heras H. (2007) Astaxanthin binding and structural stability of the
- 447 apple snail carotenoprotein ovorubin. Arch Biochem Biophys 460:107-112.
- 448 doi:10.1016/j.abb.2006.12.033.
- 449 Dreon MS, Fernández PE, Gimeno EJ et al. (2014) Insights into Embryo Defenses of the

450 Invasive Apple Snail *Pomacea canaliculata*: Egg Mass Ingestion Affects Rat Intestine  
451 Morphology and Growth. PLoS Negl Trop Dis 8:e2961. doi:10.1371/journal.pntd.0002961.

452 Dreon MS, Frassa MV, Ceolín M et al. (2013) Novel Animal Defenses against Predation: A  
453 Snail Egg Neurotoxin Combining Lectin and Pore-Forming Chains That Resembles Plant  
454 Defense and Bacteria Attack Toxins. PLoS One 8:e63782. doi:10.1371/journal.pone.0063782.

455 Dreon MS, Ituarte S & Heras H. (2010) The role of the proteinase inhibitor ovorubin in apple  
456 snail eggs resembles plant embryo defense against predation. PLoS One 5.  
457 doi:10.1371/journal.pone.0015059.

458 Dreon MS, Schinella G, Heras H et al. (2004) Antioxidant defense system in the apple snail  
459 eggs, the role of ovorubin. Arch Biochem Biophys 422. doi:10.1016/j.abb.2003.11.018.

460 Duffey SS & Stout MJ. (1996) Antinutritive and Toxic Components of Plant Defense Against  
461 Insects. Arch Insect Biochem Physiol 32:3–37. doi:10.1002/(SICI)1520-  
462 6327(1996)32:1<3::AID-ARCH2>3.0.CO;2-1.

463 Giglio M, Garro C, Caviedes-Vidal E et al. (2018) Egg perivitelline fluid of the invasive snail  
464 *Pomacea canaliculata* affects mice gastrointestinal function and morphology. PeerJ 6:e5314.  
465 doi:10.7717/peerj.5314.

466 Giglio ML, Ituarte S, Ibañez AE et al. (2020) Novel Role for Animal Innate Immune Molecules:  
467 Enterotoxic Activity of a Snail Egg MACPF-Toxin. Front Immunol 11:1–14.  
468 doi:10.3389/fimmu.2020.00428.

469 Hammond SA, Warren RL, Vandervalk BP et al. (2017) The North American bullfrog draft  
470 genome provides insight into hormonal regulation of long noncoding RNA. Nat Commun 8:1–  
471 8. doi:10.1038/s41467-017-01316-7.

472 Hayes KA, Burks RL, Castro-Vazquez A et al. (2015) Insights from an integrated view of the  
473 biology of apple snails (caenogastropoda: Ampullariidae). Malacologia 58:245-302.  
474 doi:10.4002/040.058.0209

475 Hayes KA, Cowie RH, Thiengo SC et al. (2012) Comparing apples with apples: Clarifying the  
476 identities of two highly invasive Neotropical Ampullariidae (Caenogastropoda). Zool J Linn  
477 Soc 166:723–753. [doi.org/10.1111/j.1096-3642.2012.00867.x](https://doi.org/10.1111/j.1096-3642.2012.00867.x)

478 Hayes KA, Joshi RC, Thiengo SC et al. (2008) Out of South America: Multiple origins of non-  
479 native apple snails in Asia. Divers Distrib 14:701–712. doi:10.1111/j.1472-4642.2008.00483.x.

480 Heras H, Dreon MS, Ituarte S et al. (2007) Egg carotenoproteins in neotropical Ampullariidae  
481 (Gastropoda: Architaenioglossa). CompBiochemPhysiol C 146:158–167.  
482 doi:10.1016/j.cbpc.2006.10.013

483 Heras H, Frassa MV, Fernández PE et al. (2008) First egg protein with a neurotoxic effect on  
484 mice. Toxicon 52. doi:10.1016/j.toxicon.2008.06.022.

485 Heras H, Garin CF & Pollero RJ. (1998) Biochemical composition and energy sources during  
486 embryo development and in early juveniles of the snail *Pomacea canaliculata* (Mollusca:  
487 Gastropoda). J Exp Zool 280:375–383. doi:10.1002/(SICI)1097-  
488 010X(19980415)280:6<375::AID-JEZ1>3.0.CO;2-K.

489 Hirai T. (2004) Diet composition of introduced bullfrog, *Rana catesbeiana*, in the Mizorogaike  
490 Pond of Kyoto, Japan. Ecol Res 19:375–380. doi:10.1111/j.1440-1703.2004.00647.x.

491 Ituarte S, Broila TR, Dreon MS et al. (2019) Non-digestible proteins and protease inhibitors:  
492 Implications for defense of the colored eggs of the freshwater apple snail *Pomacea canaliculata*.  
493 Can J Zool 97:558–566. doi:10.1139/cjz-2018-0210.

494 Ituarte S, Broila TR, Fernández PE et al. (2018) A lectin of a non-invasive apple snail as an egg  
495 defense against predation alters the rat gut morphophysiology. PLoS One 13.  
496 doi:10.1371/journal.pone.0198361.

497 Kamler E. (2005) Parent-egg-progeny relationships in teleost fishes: An energetics perspective.  
498 Rev Fish Biol Fish 15:399–421. doi:10.1007/s11160-006-0002-y.

499 Kaptan E, Sengezer Inceli M & Sancar Bas S. (2013) Lectin binding properties of liver, small

intestine and tail of metamorphosing marsh frog (*Pelophylax ridibundus* Pallas 1771). Acta  
Histochem 115:595–602. doi:10.1016/j.acthis.2013.01.002.

Karasov WH & Douglas AE. (2013) Comparative digestive physiology. Compr Physiol 3:741–  
783. doi:10.1002/cphy.c110054.

Lowe S, Browne M, Boudjelas S et al. (2000) 100 of the World's Worst Invasive Alien Species  
A selection from the Global Invasive Species Database, World Conservation Union (IUCN),  
Auckland.

Lowry OH, Rosenbrough NJ, Farr AL et al. (1951) Protein measurement with the Folin phenol  
reagent. J Biol Chem 193:265–275.

Lv S, Zhang Y, Steinmann P et al. (2011) The emergence of angiostrongyliasis in the People's  
Republic of China: The interplay between invasive snails, climate change and transmission  
dynamics. Freshw Biol 56:717–734. doi:10.1111/j.1365-2427.2011.02579.x.

Martin PR & Estebenet A. (2002) Interpopulation variation in life history of *Pomacea*  
*canaliculata* (gastropoda: Ampullariidae) in southwestern Buenos Aires Province. Argentina.  
Malacologia 4:153–163.

McGavin, M.D. and Zachary (2017). Acute inflammation. In: Pathologic basis of veterinary  
disease, 4<sup>th</sup> ed. Mosby-Elsevier, Missouri, pp. 73-131.

National Research council. (2010) Guide for the Care and Use of Laboratory Animals, 8th  
edition. National Academies Press 1–246, Washington D.C.

Naya DE, Farfán G, Sabat P et al. (2005) Digestive morphology and enzyme activity in the  
Andean toad *Bufo spinulosus*: Hard-wired or flexible physiology? Comp Biochem Physiol - A  
Mol Integr Physiol 140:165–170. doi:10.1016/j.cbpb.2004.11.006.

Oliveira JT, Rios FJ, Vasconcelos IM et al. (2004) *Cratylia argentea* seed lectin, a possible  
defensive protein against plant-eating organisms: effects on rat metabolism and gut histology.  
Food Chem Toxicol 42:1737–1747. doi:10.1016/j.fct.2004.06.018.

- 525 Ozelmas Ü & Akay MT. (1995) Histopathological Investigations of the effects of Malathion on
- 526 Dwarf Lizards (*Lacerta parva*, Boulenger 1887). Fundam Appl Toxicol:730–737.
- 527 doi:10.1007/BF00203760.
- 528 Pasquevich MY, Dreon MS, Qiu J-W et al. (2017) Convergent evolution of plant and animal
- 529 embryo defences by hyperstable non-digestible storage proteins. Sci Rep 7.
- 530 doi:10.1038/s41598-017-16185-9.
- 531 Portiansky EL, Alonso CR, Costa EF et al. (2002) Collagenous and elastic system fibres in the
- 532 aorta of cattle poisoned by *Solanum glaucophyllum*. Vet Rec, 150:42–45.
- 533 doi:10.1136/vr.150.2.42.
- 534• Przeslawski R. (2004) A review of the effects of environmental stress on embryonic
- 535 development within intertidal gastropod egg masses. MollRes, 24:43–63.
- 536 doi:[10.1071/MR04001](https://doi.org/10.1071/MR04001)
- 537 Pusztai A, Ewen SW, Grant G et al. (1995) Lectins and also bacteria modify the glycosylation
- 538 of gut surface receptors in the rat. Glycoconj J 12:22–35. doi:10.1007/BF00731865.
- 539 Ricklefs RE. (1969) An analysis of nesting mortality in birds. Smithson Contrib to Zool 1–48.
- 540 doi:10.5479/si.00810282.9.
- 541 Robert J, Grayfer L, Edholm ES et al. (2014) Inflammation-induced reactivation of the
- 542 ranavirus frog VIRUS 3 in asymptomatic *Xenopus laevis*. PLoS One 9.
- 543 doi:10.1371/journal.pone.0112904.
- 544 Ruthsatz K, Giertz LM, Schröder D et al. (2019) Chemical composition of food induces
- 545 plasticity in digestive morphology in larvae of *Rana temporaria*. Biol Open 8.
- 546 doi:10.1242/bio.048041.
- 547 Sabat P & Bozinovic F. (2000) Digestive plasticity and the cost of acclimation to dietary
- 548 chemistry in the omnivorous leaf-eared mouse *Phyllotis darwini*. J Comp Physiol - B Biochem
- 549 Syst Environ Physiol 170:411–417. doi:10.1007/s0036000000118.

550 Seliverstova E V. & Prutskova NP. (2012) Morphofunctional changes in the small intestine  
551 epithelium of the frog *Rana temporaria* in the course of hibernation. J Evol Biochem Physiol  
552 48:295–305. doi:10.1134/S0022093012030061.

553 Snow N, P & Witmer G. (2010) American Bullfrogs as Invasive Species: A Review of the  
554 Introduction, Subsequent Problems, Management Options, and Future Directions. Proc Vertebr  
555 Pest Conf 24. doi:10.5070/v424110490.

556 Sun J, Mu H, Ip JCH et al. (2019) Signatures of divergence, invasiveness, and terrestrialization  
557 revealed by four apple snail genomes. Mol Biol Evol 36:1507–1520.  
558 doi:10.1093/molbev/msz084.

559 Sun J, Zhang H, Wang H et al. (2012) First proteome of the egg perivitelline fluid of a  
560 freshwater gastropod with aerial oviposition. J Proteome Res 11:4240–4248.  
561 doi:10.1021/pr3003613.

562 Tyler MJ. (2009) Frogs and toads as experimental animals, University of Adelaide, South  
563 Australia.

564 Van Damme EJM. (2008) Plant Lectins as Part of the Plant Defense System Against Insects. In:  
565 Induced Plant Resistance to Herbivory. Springer, Dordrecht. pp 285–307. doi:10.1007/978-1-  
566 4020-8182-8\_14.

567 Vasconcelos IM & Oliveira JTA. (2004) Antinutritional properties of plant lectins. Toxicon  
568 44:385–403. doi:10.1016/j.toxicon.2004.05.005.

569 Velmurugan B, Selvanayagam M, Cengiz EI et al. (2007) Histopathology of lambda-cyhalothrin  
570 on tissues (gill, kidney, liver and intestine) of *Cirrhinus mrigala*. Environ Toxicol Pharmacol  
571 24:286–291. doi:10.1016/j.etap.2007.07.001.

572 Xia K, Manning M, Hesham H et al. (2007) Identifying the subproteome of kinetically stable  
573 proteins via diagonal 2D SDS/PAGE. Proc Natl Acad Sci U S A 104:17329–17334.  
574 doi:10.1073/pnas.0705417104.

575

# 576 **FIGURE LEGENDS**

## 577 **Figure 1. Changes in bullfrog small intestine after 24 h and 48 h gavage with apple snail egg**

### 578 **PVF.**

579 **A.** Small intestine schemes highlighting parameters determined for morphometry. Left image:  
580 Section area (SA) defined as the region of interest (ROI) within the green line that includes  
581 mucosa and lumen space. Middle image: Tissue area (TA) shown in red within the ROI including  
582 only mucosa. Right image: ROI (in green) delimiting the lumen area. **B.** Changes in relative tissue  
583 area (TA). **C.** Changes in the lumen space ratio (lumen area/SA). 24 h after ingestion of *P.*  
584 *canaliculata* PVF, an increment in TA as well as a decrease in lumen space when compared to  
585 control group was observed. Note that these changes are partially reverted 48h after treatment  
586 where TA and lumen space begin to return to control levels. **D.** Absorptive surface (perimeter/SA)  
587 displays no changes regardless the time assayed after treatment. **E.** Typical small intestine of  
588 controls with a large lumen space and long and thin villi (arrow indicates lymphatic capillaries).  
589 **F.** Representative 24 h post-treatment section displaying a reduced lumen space with wider villi.  
590 Lymphatic capillaries (arrow) are reduced due to an increased connective tissue. **G.** Small  
591 intestine 48 h post-gavage showing villi gradually returning to control levels though its chorion  
592 still shows reduced lymphatic capillaries due to thickening of the connective tissue. Scale bar 100  
593  $\mu\text{m}$ .

594

## 595 **Fig 2. Bullfrog small intestine hemorrhage induced by *Pomacea canaliculata* eggs PVF** 596 **ingestion.**

597 **A.** Representative control villi section. Inset: detail of villi chorion. **B.** 24h post-treatment  
598 showing signs of weak hemorrhages (rectangles) and epithelial disorganization at the tips of villi  
599 (arrows). Inset: detail of the weak hemorrhage (rectangle). Scale bar 100  $\mu\text{m}$ .

600

601 **Fig 3. Presence of eosinophils and macrophages in bull frogs' small intestine after gavage of**  
 602 ***Pomacea canaliculata* eggs PVF.**

603 A-C Eosinophils (HE), D-F Macrophages (IHC). **A.** Control sections, eosinophils are marked  
 604 with an arrow. Inset: eosinophil showing typical cytoplasmic granules (scale bar 10  $\mu$ m); **B.** 24h  
 605 post-gavage; **C.** 48h post-gavage intestines. D-F. Representative images showing intestine  
 606 macrophages (arrows) which were more prevalent 24 h after gavage with egg PVF. **D.** Control  
 607 intestines showing immunolabelled macrophages with CD<sup>68+</sup>. Inset: detail of a macrophage (scale  
 608 bar 10  $\mu$ m); **E.** 24 h after-gavage; **F.** 48h after-gavage. **G.** Percentage of total collagen in the  
 609 mucosa after 24 h and 48 h post gavage. H Ratio between collagen type I and III. A-F scale bar  
 610 40  $\mu$ m.

612 **Figure 4. Effect of snail egg PVF ingestion on bullfrog small intestine glycosylation**  
 613 **pattern.**

614 Lectin histochemistry using DBA, PNA, SBA. **DBA** does not stain supranuclear zone (arrows)  
 615 and Goblet cells (arrow heads) 24 h after-gavage when compared to control. These effects are  
 616 reverted after 48 h post-gavage. **PNA** strongly stains supranuclear zone (arrows) in control  
 617 sections although this is not seen in experimental intestines. **SBA** shows light staining in  
 618 enterocytes of control animals (arrows) but a strong staining at the supranuclear zone is observed  
 619 in 24 h after-gavage of experimental frogs. Staining with SBA of 48h after gavage intestines is  
 620 observed not only at the supranuclear zone but also in the apical zone. Bar = 40  $\mu$ m. For the  
 621 complete glycosylation pattern refer to Table 1.

623 **Fig 5. Binding of PcPV2 to bullfrog small intestine.**

624 Immunolocalization of PcPV2 at the brush border of frog enterocytes. Control group (Control)  
 625 show no anti-PcPV2 antibody binding (arrow) while at 24 h post-gavage of *P. canaliculata* PVF  
 626 containing the equivalent of 200 $\mu$ g PcPV2, a strong labelled epithelium was observed, especially



627 at the glycocalyx of the villi (brown colour, arrows) (24 h). The same binding pattern is observed  
628 at 48 h post-gavage (brown colour, arrows) (48 h). Scale bar 40  $\mu\text{m}$ .

**Table 1. Glycosylation pattern of bullfrog small intestine villi after snail egg PVF gavage.**

Glycosylation changes in villi regions (see left image) were assayed by lectin histochemistry 24 h and 48 h after gavage and compared to control. No changes are symbolized with (=), and up or down arrows indicate increased or decreased reactivity, respectively. Thin arrows indicate less change (see text and Fig. 4 for details on DBA, PNA and SBA). The acronym of each lectin and their relative glycan specificity are indicated in the first two columns.

|                                                                                   | Lectin | Specificity                            | Apical |    | Supranuclear |    | Stroma |    | Goblet |    |
|-----------------------------------------------------------------------------------|--------|----------------------------------------|--------|----|--------------|----|--------|----|--------|----|
|                                                                                   |        |                                        | 24     | 48 | 24           | 48 | 24     | 48 | 24     | 48 |
| 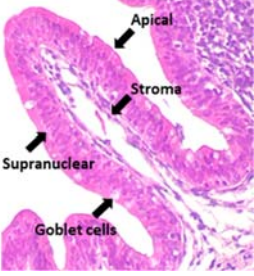 | Con A  | $\alpha$ -D-Man; $\alpha$ -D-Glc       | =      | =  | =            | =  | =      | =  | =      | =  |
|                                                                                   | DBA    | $\alpha$ -D-GalNAc                     | =      | ↑  | =            | ↑  | =      | =  | =      | ↑  |
|                                                                                   | WGA    | $\beta$ -D-GlcNAc; NeuNA               | =      | =  | =            | =  | =      | =  | =      | =  |
|                                                                                   | PNA    | $\beta$ -D-Gal ( $\beta$ 1-3) D-GalNAc | =      | =  | ↓            | ↓  | ↓      | ↓  | =      | =  |
|                                                                                   | UEA I  | $\alpha$ -L-Fuc                        | =      | =  | =            | =  | =      | =  | =      | =  |
|                                                                                   | SBA    | $\alpha$ -D-GalNAc; $\beta$ -D-GalNAc  | ↑      | ↑  | ↑            | ↑  | =      | =  | =      | =  |
|                                                                                   | RCA I  | $\beta$ -Gal                           | =      | =  | ↓            | =  | =      | =  | =      | =  |

Figure 1

bioRxiv preprint doi: <https://doi.org/10.1101/2020.07.07.191684>; this version posted July 7, 2020. The copyright holder for this preprint (which was not certified by peer review) is the author/funder, who has granted bioRxiv a license to display the preprint in perpetuity. It is made available under aCC-BY-NC-ND 4.0 International license.

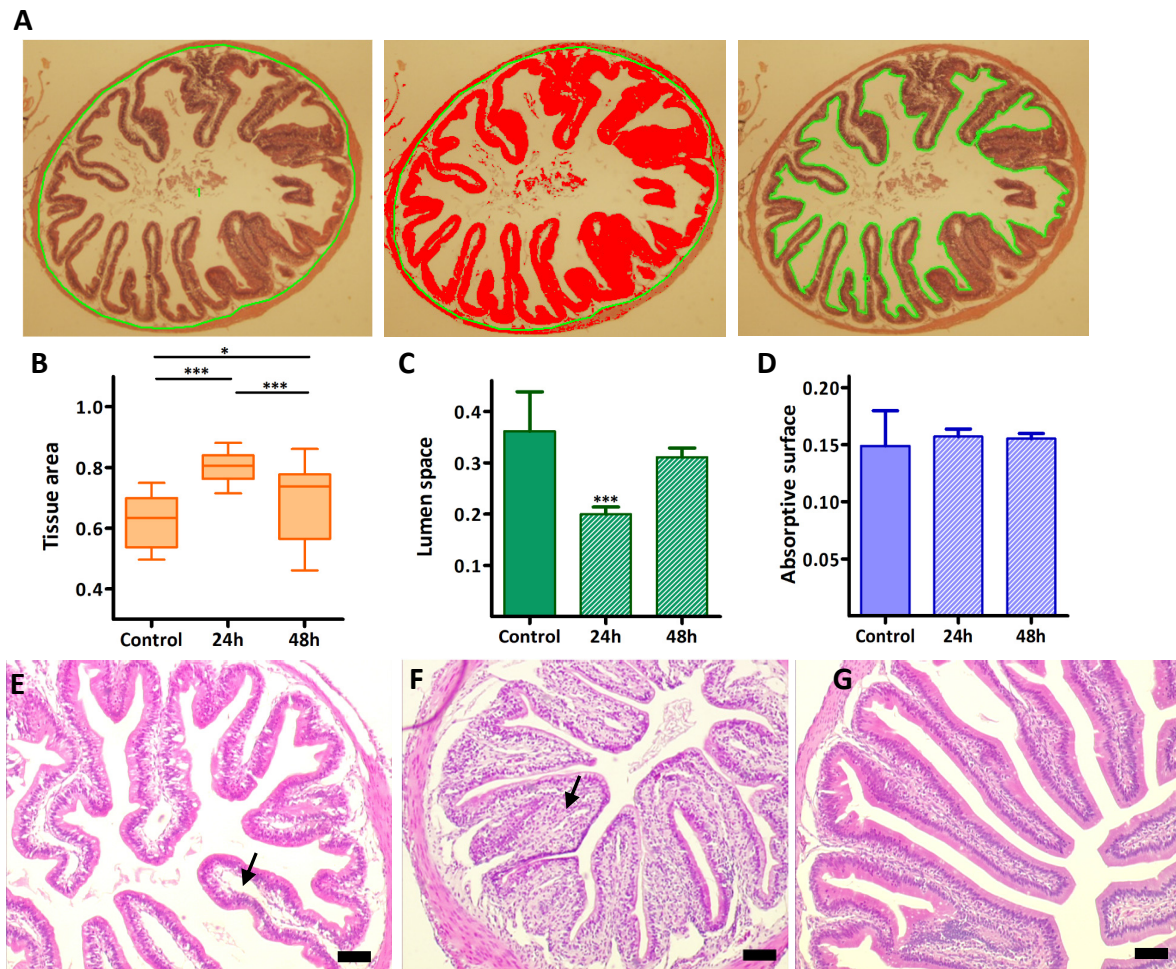

Figure 2

bioRxiv preprint doi: <https://doi.org/10.1101/2020.07.07.191684>; this version posted July 7, 2020. The copyright holder for this preprint (which was not certified by peer review) is the author/funder, who has granted bioRxiv a license to display the preprint in perpetuity. It is made available under aCC-BY-NC-ND 4.0 International license.

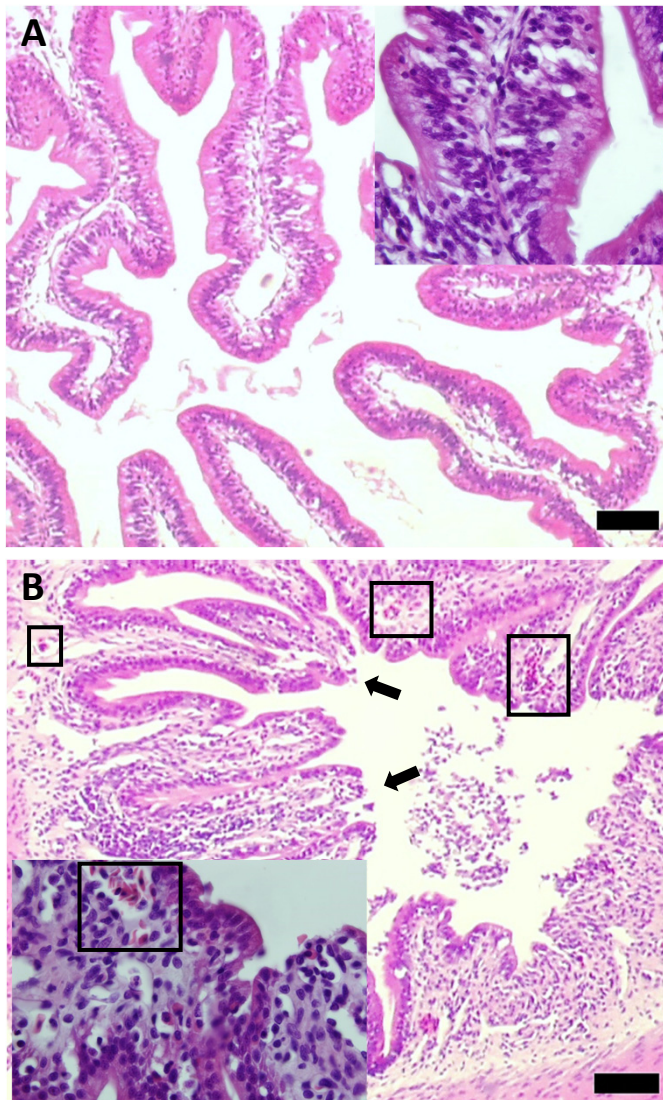



Figure 3

bioRxiv preprint doi: <https://doi.org/10.1101/2020.07.07.191684>; this version posted July 7, 2020. The copyright holder for this preprint (which was not certified by peer review) is the author/funder, who has granted bioRxiv a license to display the preprint in perpetuity. It is made available under aCC-BY-NC-ND 4.0 International license.

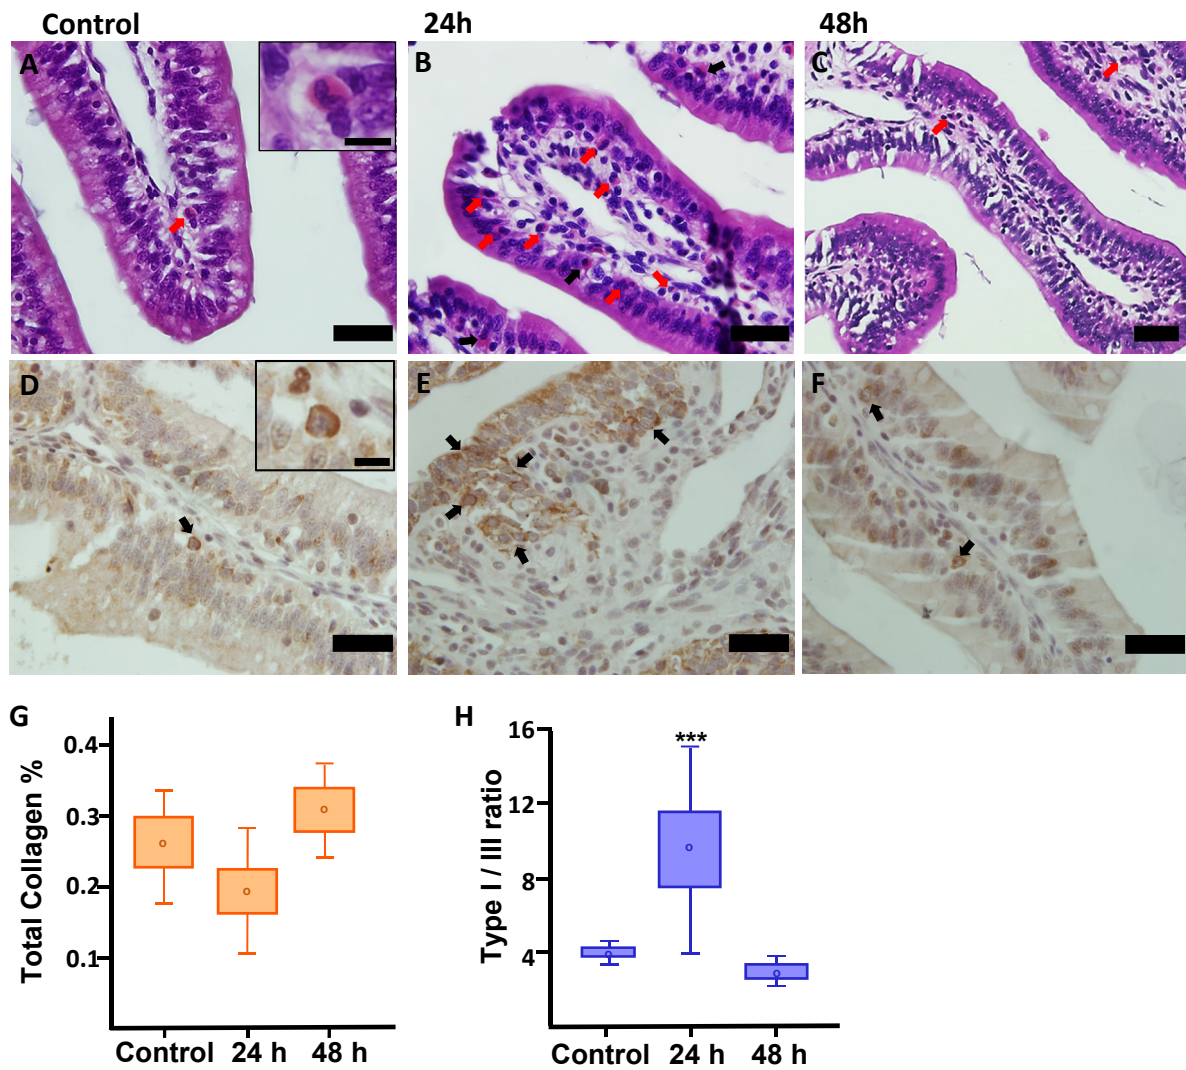

Figure 4

bioRxiv preprint doi: <https://doi.org/10.1101/2020.07.07.191684>; this version posted July 7, 2020. The copyright holder for this preprint (which was not certified by peer review) is the author/funder, who has granted bioRxiv a license to display the preprint in perpetuity. It is made available under aCC-BY-NC-ND 4.0 International license.

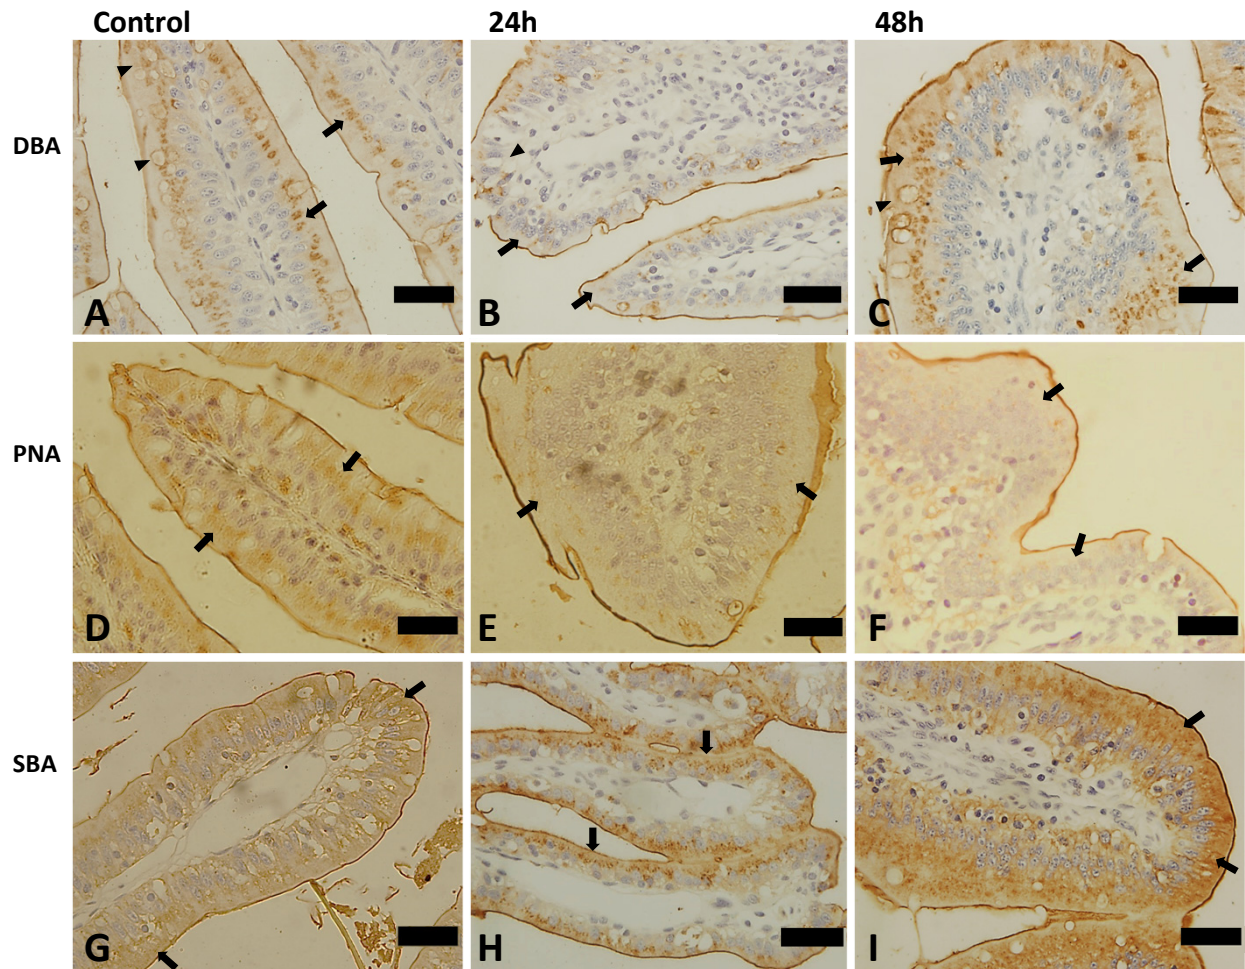

Figure 5

bioRxiv preprint doi: <https://doi.org/10.1101/2020.07.07.191684>; this version posted July 7, 2020. The copyright holder for this preprint (which was not certified by peer review) is the author/funder, who has granted bioRxiv a license to display the preprint in perpetuity. It is made available under aCC-BY-NC-ND 4.0 International license.

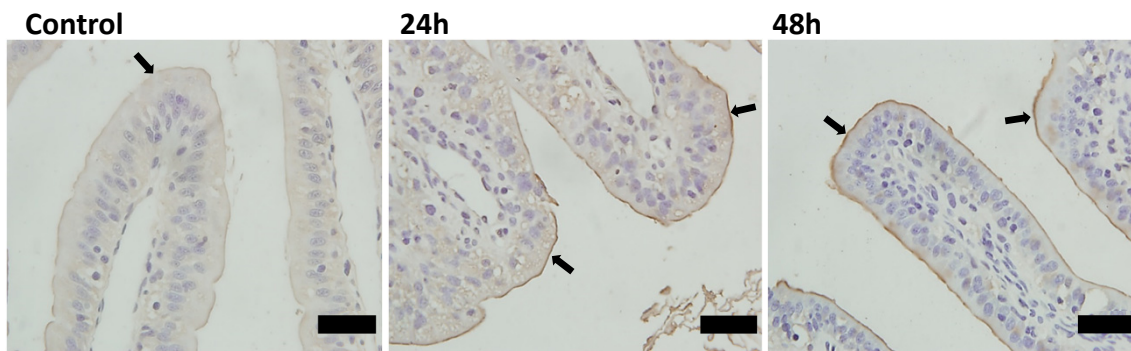

Source: https://www.biorxiv.org/content/biorxiv/early/2020/07/07/2020.07.07.191684.full.pdf
